# Supplementary material for: Kierkegaard and modern moral philosophy: Conceptual unintelligibility, moral obligations and divine commands
Source: MDPI journal article supplement (doi:10.3390/ijms222312826), 2009-04-03
Supplement: s1 [file s1]

## Supplementary Materials

# Towards property profiling: Synthesis and SAR probing of new tetracyclic diazaphenothiazine analogues

Anna Empel <sup>1</sup>, Andrzej Bak <sup>2,\*</sup>, Violetta Kozik <sup>2</sup>, Malgorzata Latocha <sup>3</sup>, Alois Cizek <sup>4</sup>, Josef Jampilek <sup>5,6</sup>, Kinga Suwinska <sup>7</sup>, Aleksander Sochanik <sup>8</sup> and Andrzej Zieba <sup>1,\*</sup>

<sup>1</sup> Department of Organic Chemistry, Faculty of Pharmaceutical Sciences in Sosnowiec, Medical University of Silesia in Katowice, Jagiellońska 4, 41-200 Sosnowiec, Poland; anna.empel00@gmail.com (A.E.); zieba@sum.edu.pl (A.Z.)

<sup>2</sup> University of Silesia, Institute of Chemistry, Szkolna 9, 40-007 Katowice, Poland; andrzej.bak@us.edu.pl (A.B.); violetta.kozik@us.edu.pl (V.K.)

<sup>3</sup> Department of Cell Biology, Faculty of Pharmaceutical Sciences in Sosnowiec, Medical University of Silesia in Katowice, Jedności 9, 41-200 Sosnowiec, Poland; mlatocha@sum.edu.pl (M.L.)

<sup>4</sup> Department of Infectious Diseases and Microbiology, Faculty of Veterinary Medicine, University of Veterinary Sciences Brno, Palackeho 1946/1, 61242 Brno, Czech Republic; cizeka@vfu.cz (A.C.)

<sup>5</sup> Department of Analytical Chemistry, Faculty of Natural Sciences, Comenius University, Ilkovicova 6, 842 15 Bratislava, Slovakia; josef.jampilek@gmail.com (J.J.)

<sup>6</sup> Department of Chemical Biology, Faculty of Science, Palacky University Olomouc, Slechtitelu 27, 783 71 Olomouc, Czech Republic

<sup>7</sup> Faculty of Mathematics and Natural Sciences, Cardinal Stefan Wyszyński University, K. Woycieckiego 1/3, 01-938 Warszawa, Poland; k.suwinska@uksw.edu.pl (K.S.)

<sup>8</sup> Center for Translational Research and Molecular Biology of Cancer, Maria Skłodowska-Curie National Research Institute of Oncology, Wybrzeże AK 15, 44-101 Gliwice, Poland; aleksander.sochanik@io.gliwice.pl (A.S.)

\* Correspondence: zieba@sum.edu.pl (A.Z.); andrzej.bak@us.edu.pl (A.B.)

**Figure S1.**  $^1\text{H}$  NMR Spectrum in  $\text{CD}_3\text{OD}$  of compound **3a**.

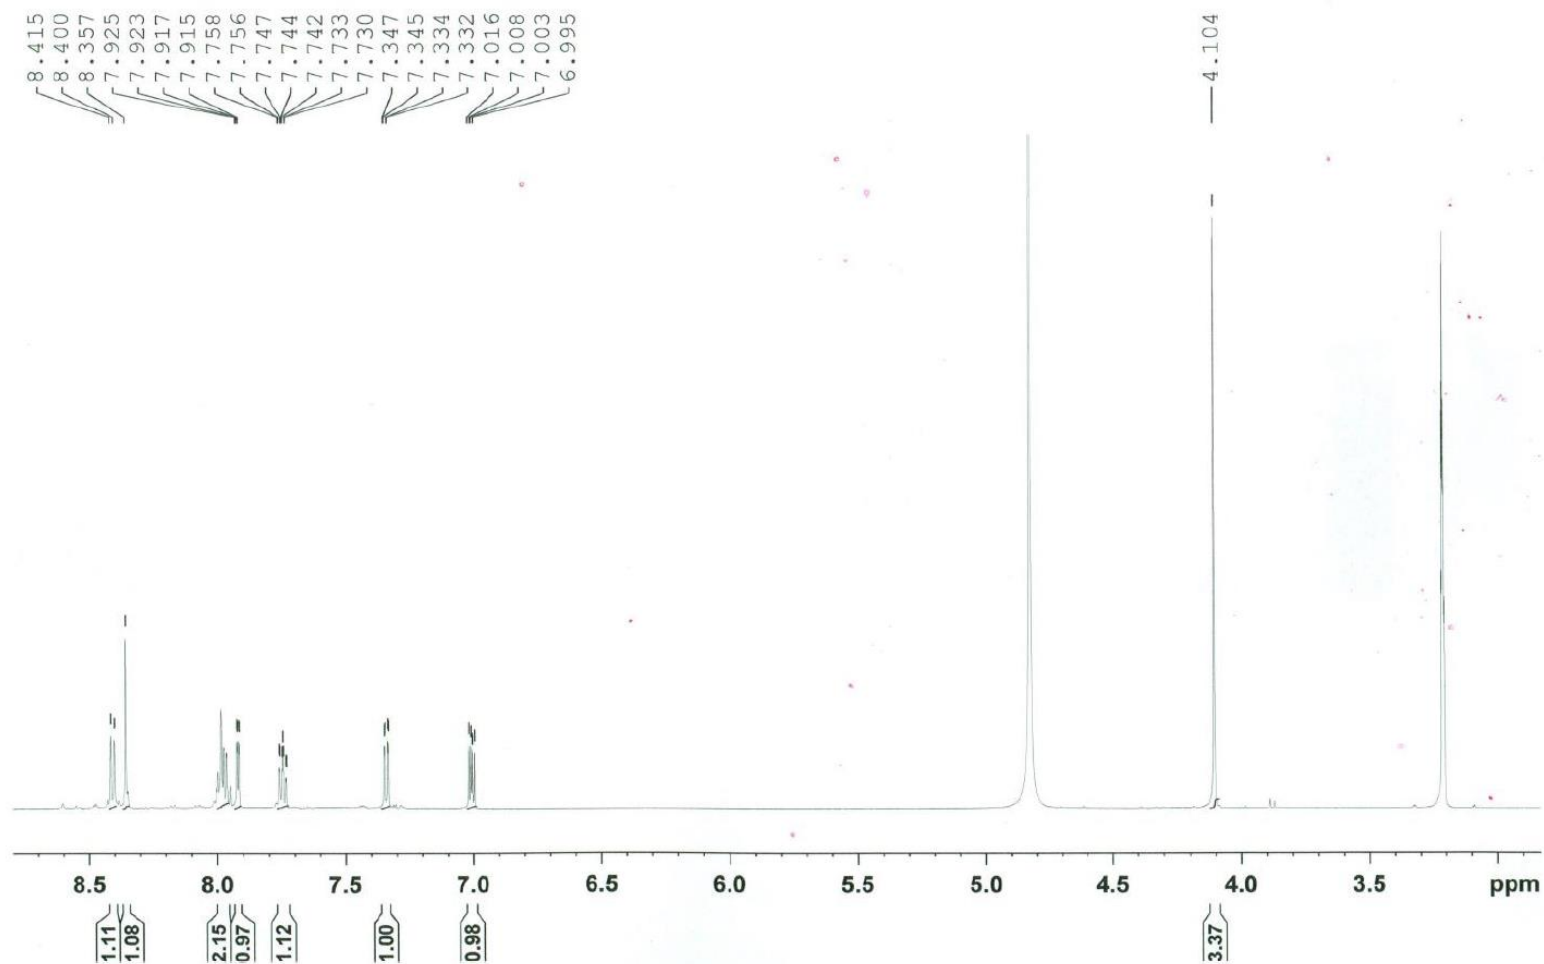

**Figure S2.**  $^{13}\text{C}$  NMR Spectrum in  $\text{CD}_3\text{OD}$  of compound **3a**.

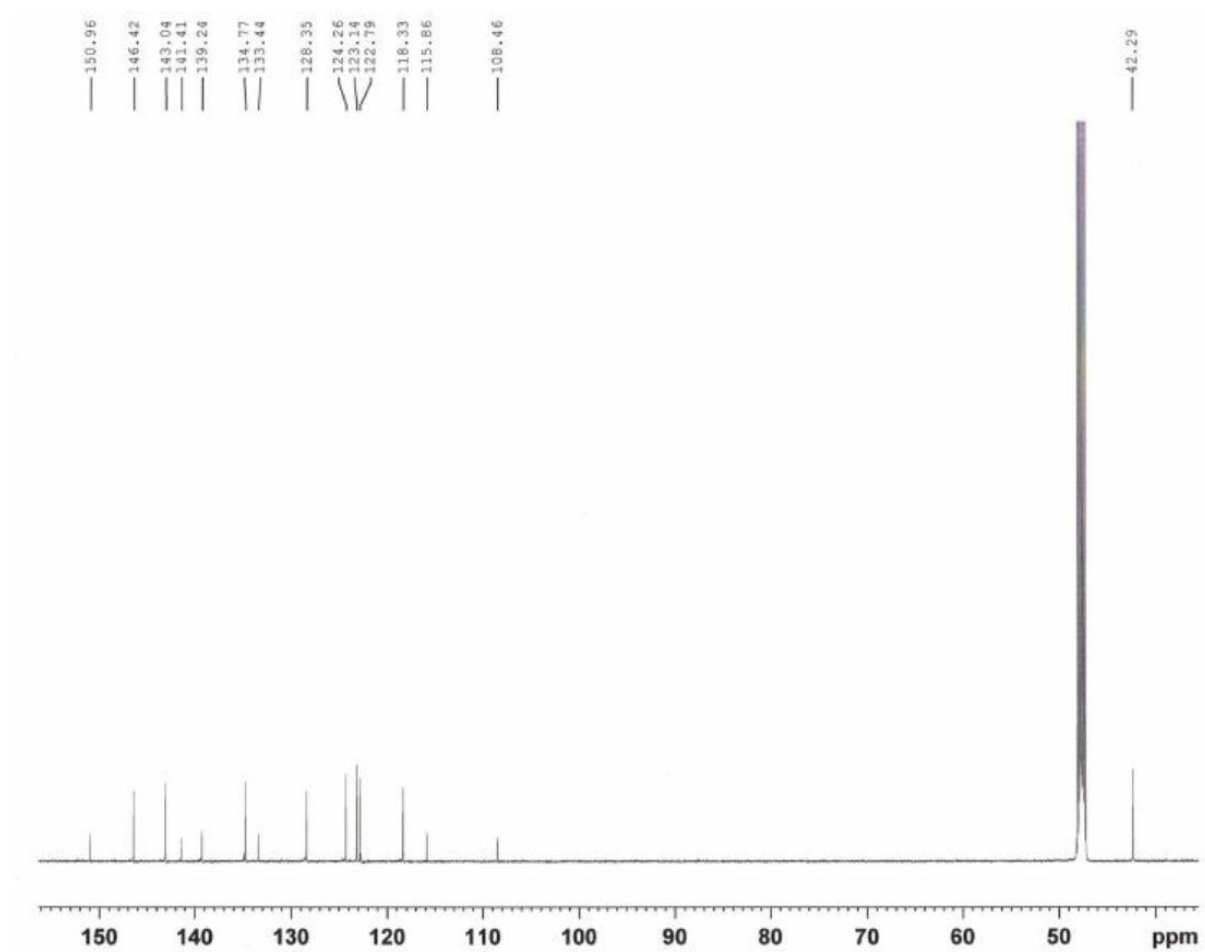

**Figure S3.**  $^1\text{H}$  NMR Spectrum in  $\text{CD}_3\text{OD}$  of compound **3b**.

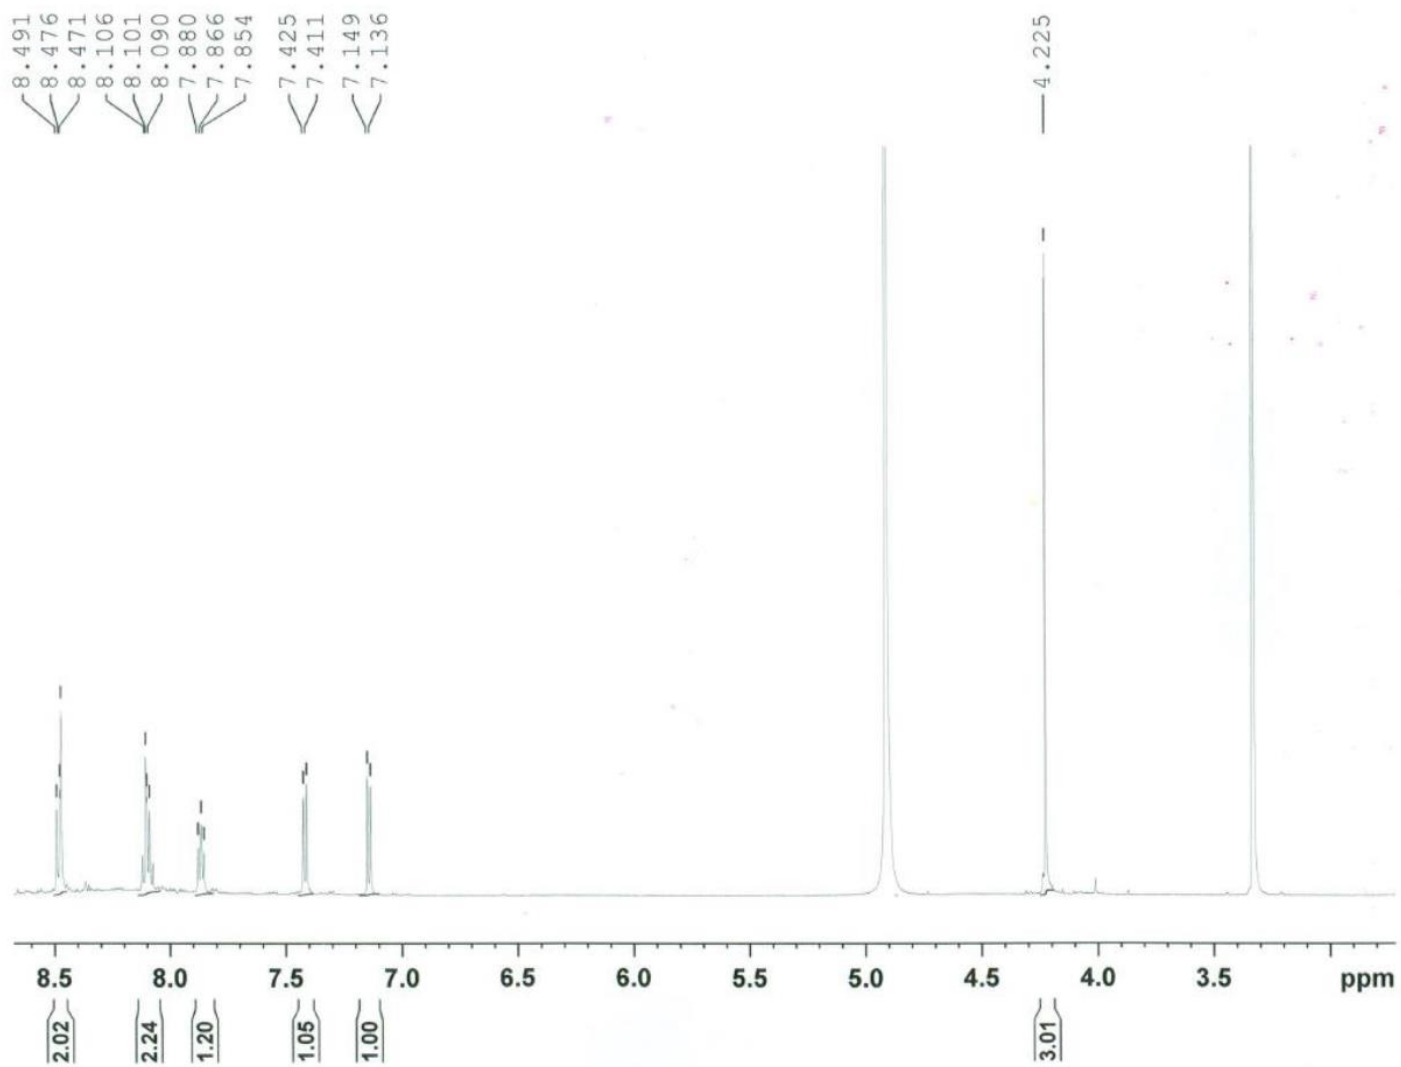

**Figure S4.**  $^{13}\text{C}$  NMR Spectrum in  $\text{CD}_3\text{OD}$  of compound **3b**.

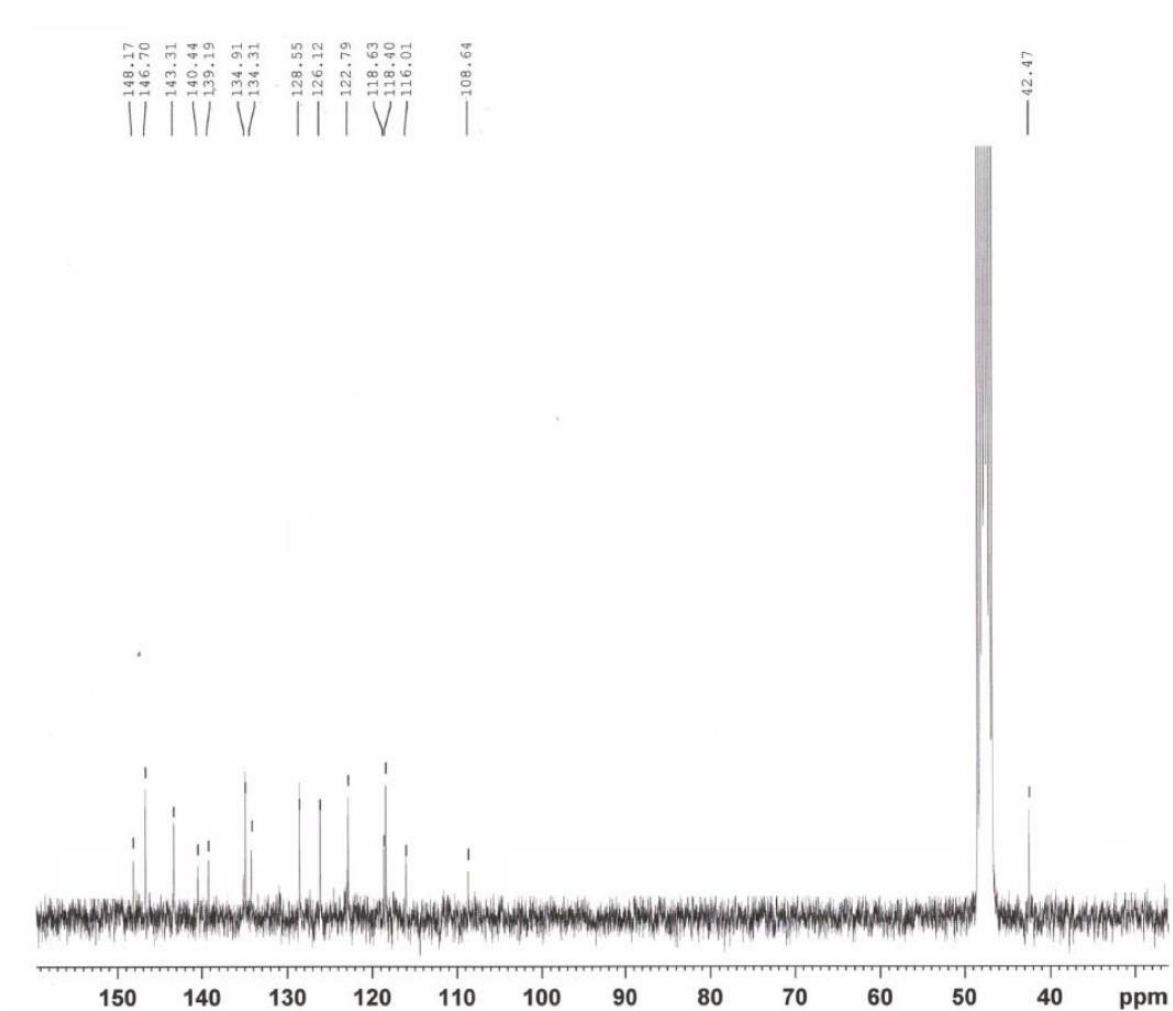

**Figure S5.**  $^1\text{H}$  NMR Spectrum in  $\text{CD}_3\text{OD}$  of compound **3c**.

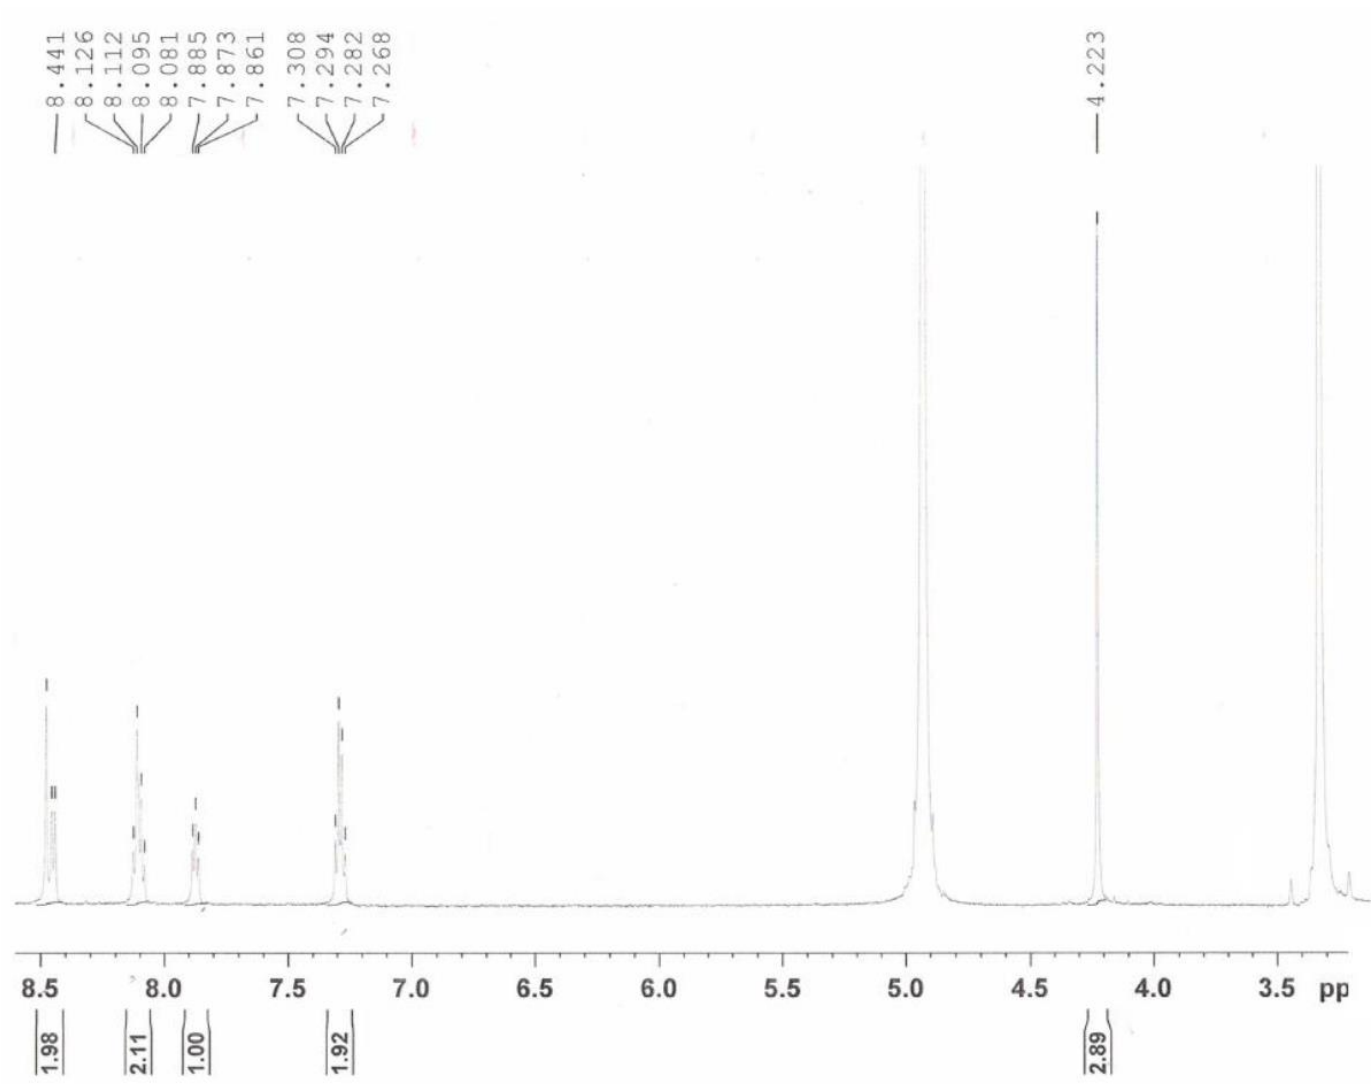

**Figure S6.**  $^{13}\text{C}$  NMR Spectrum in  $\text{CD}_3\text{OD}$  of compound **3c**.

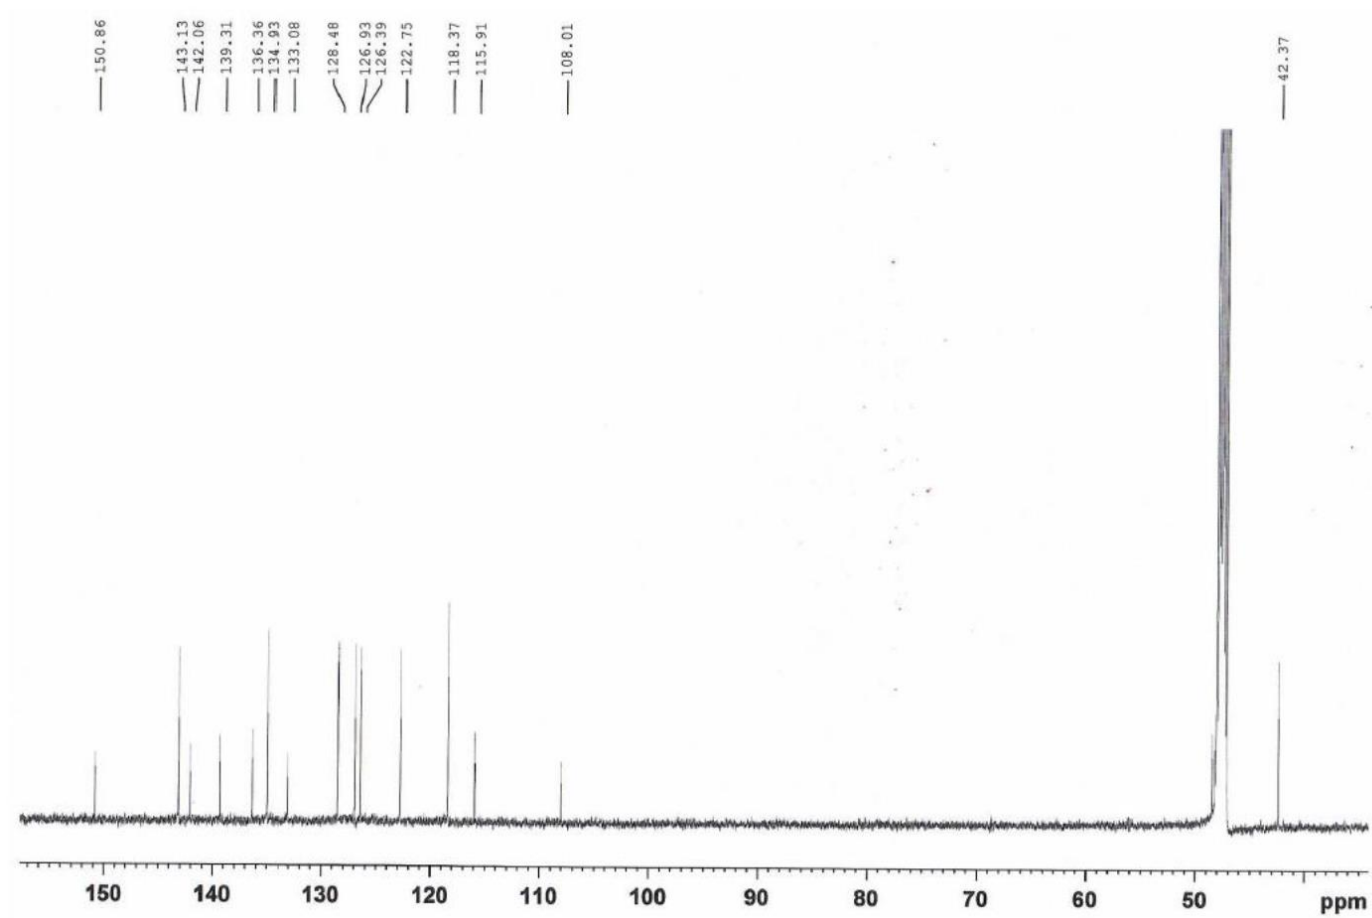

**Figure S7.**  $^1\text{H}$  NMR Spectrum in  $\text{CD}_3\text{OD}$  of compound **3d**.

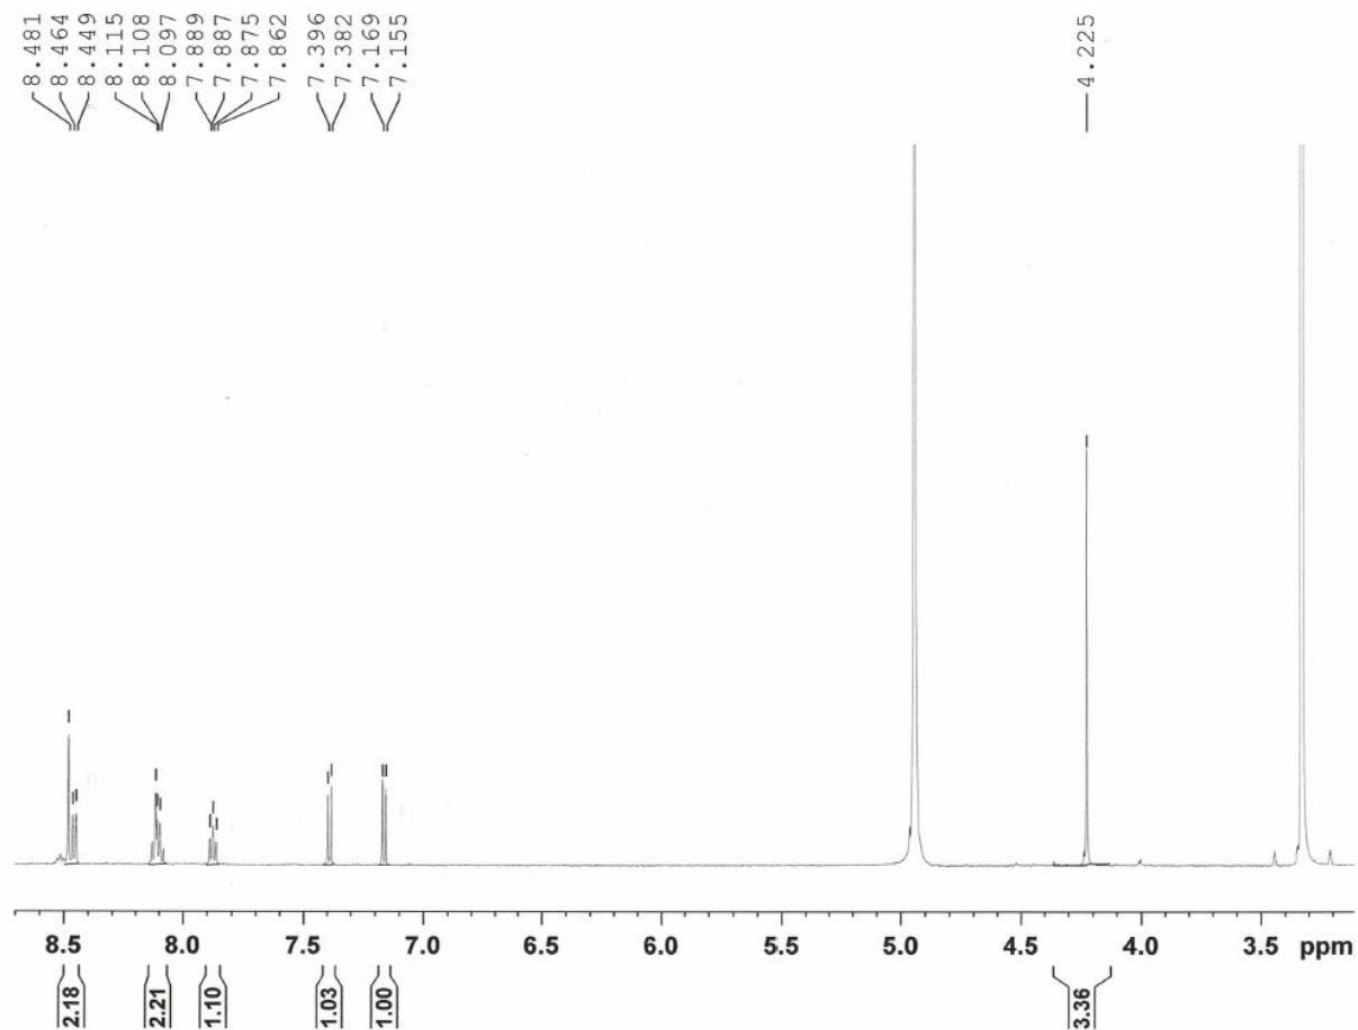

**Figure S8.**  $^{13}\text{C}$  NMR Spectrum in  $\text{CD}_3\text{OD}$  of compound **3d**.

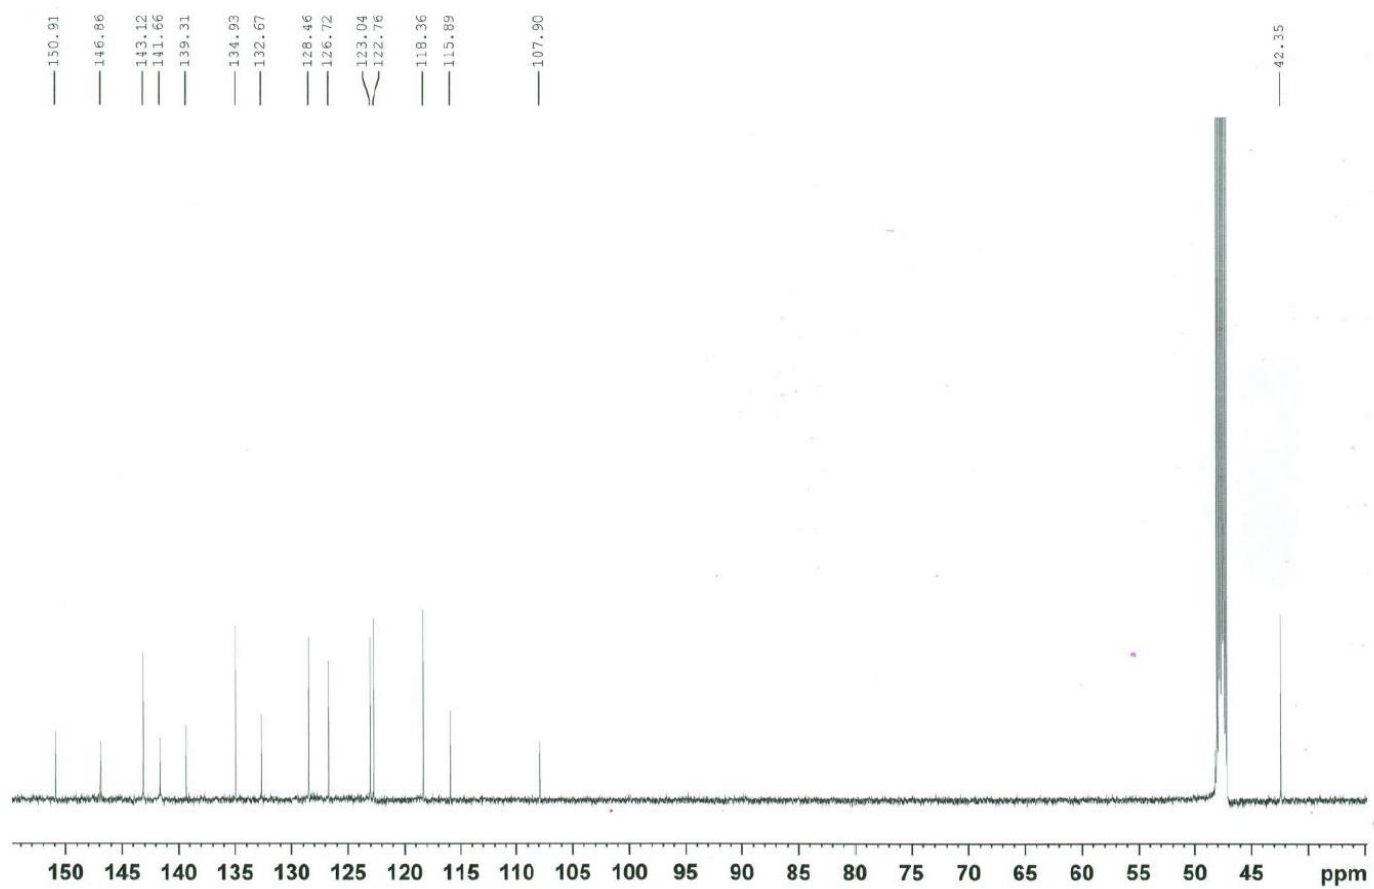

**Figure S9.**  $^1\text{H}$  NMR Spectrum in  $\text{CD}_3\text{OD}$  of compound **3e**.

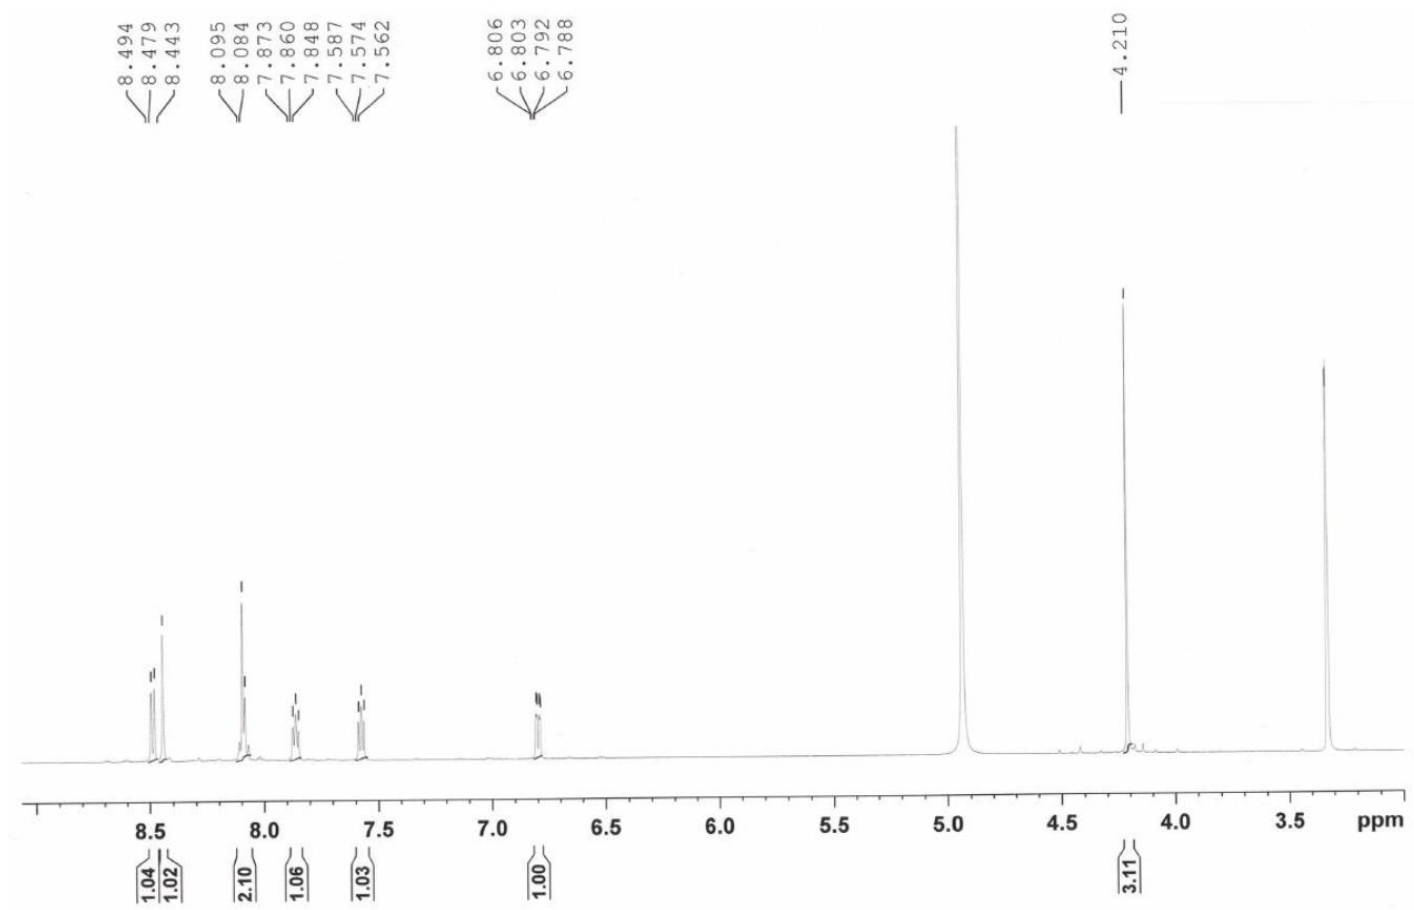

**Figure S10.**  $^{13}\text{C}$  NMR Spectrum in  $\text{CD}_3\text{OD}$  of compound **3e**.

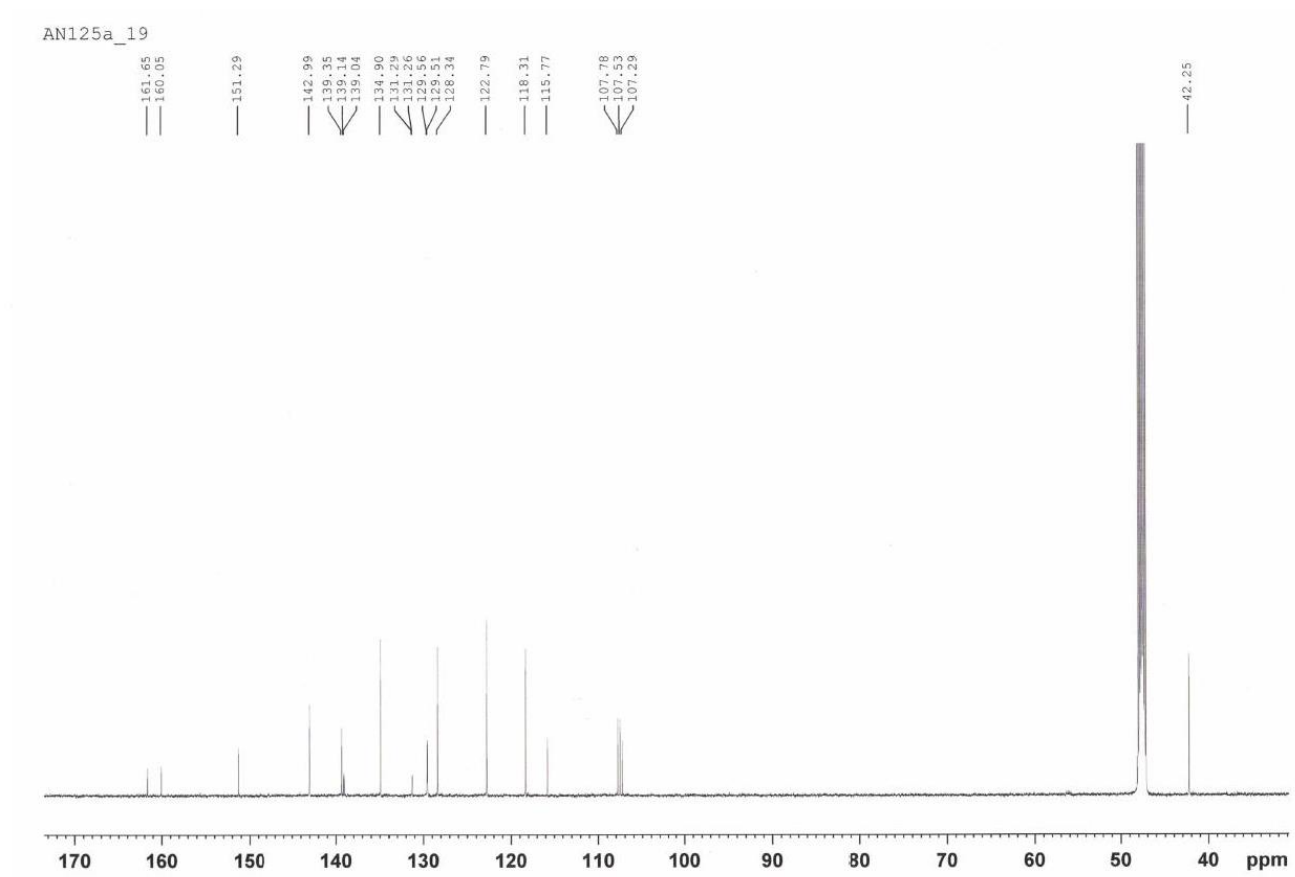

**Figure S11.**  $^1\text{H}$  NMR Spectrum in  $\text{CD}_3\text{OD}$  of compound **3f**.

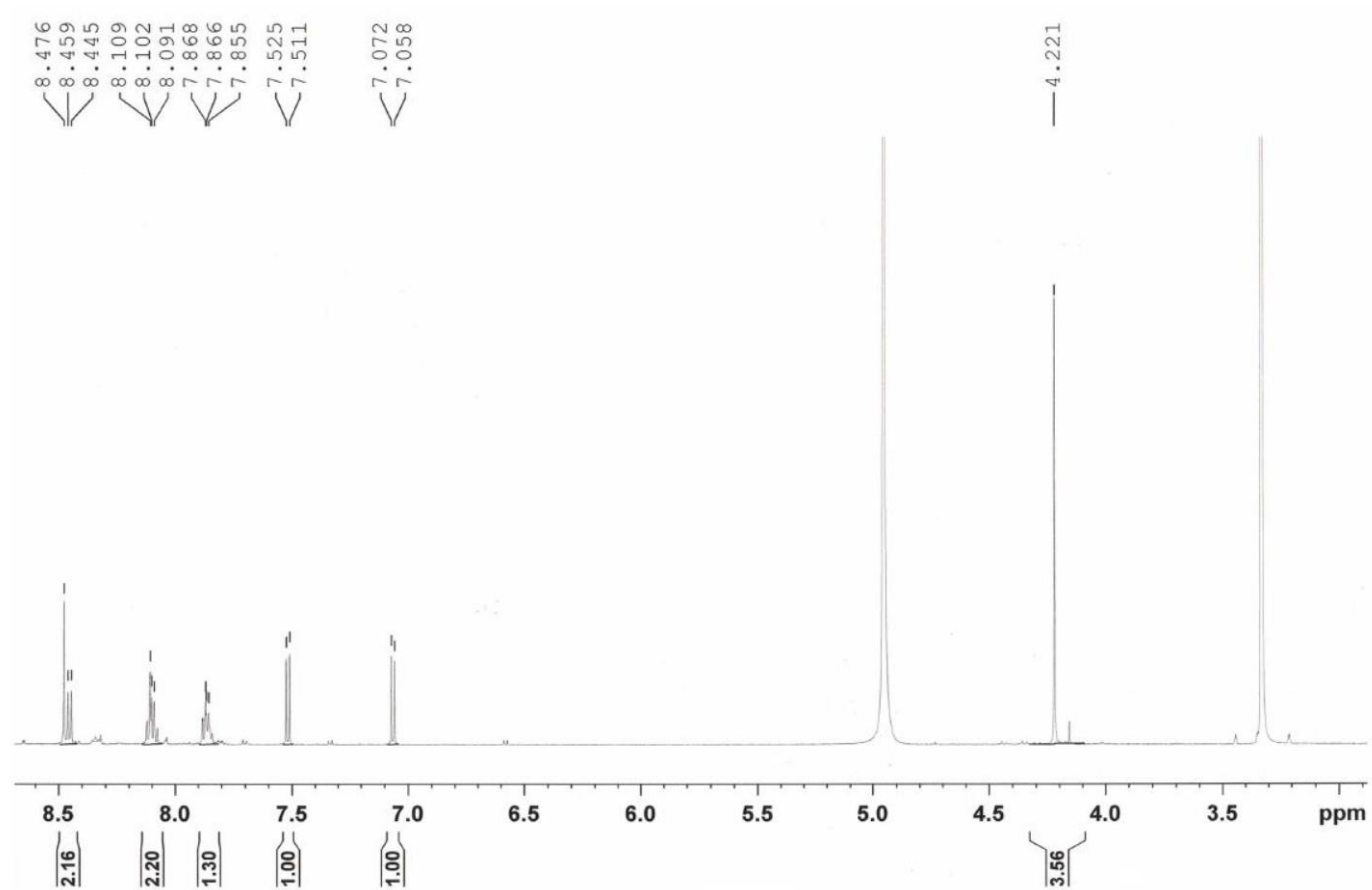

**Figure S12.**  $^{13}\text{C}$  NMR Spectrum in  $\text{CD}_3\text{OD}$  of compound **3f**.

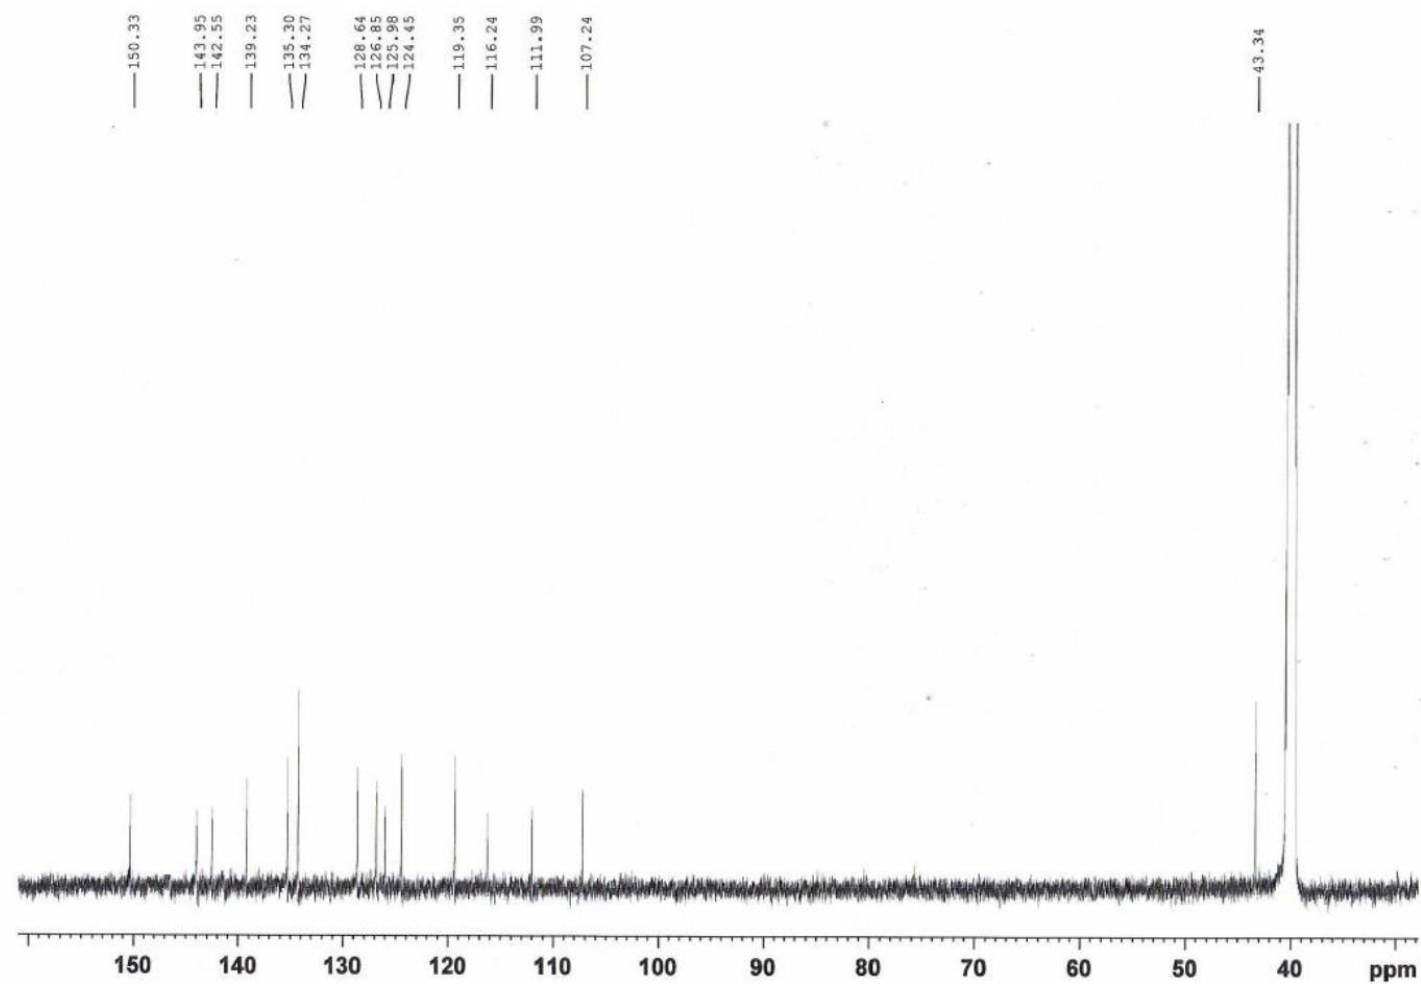

**Figure S13.**  $^1\text{H}$  NMR Spectrum in  $\text{CD}_3\text{OD}$  of compound **3g**.

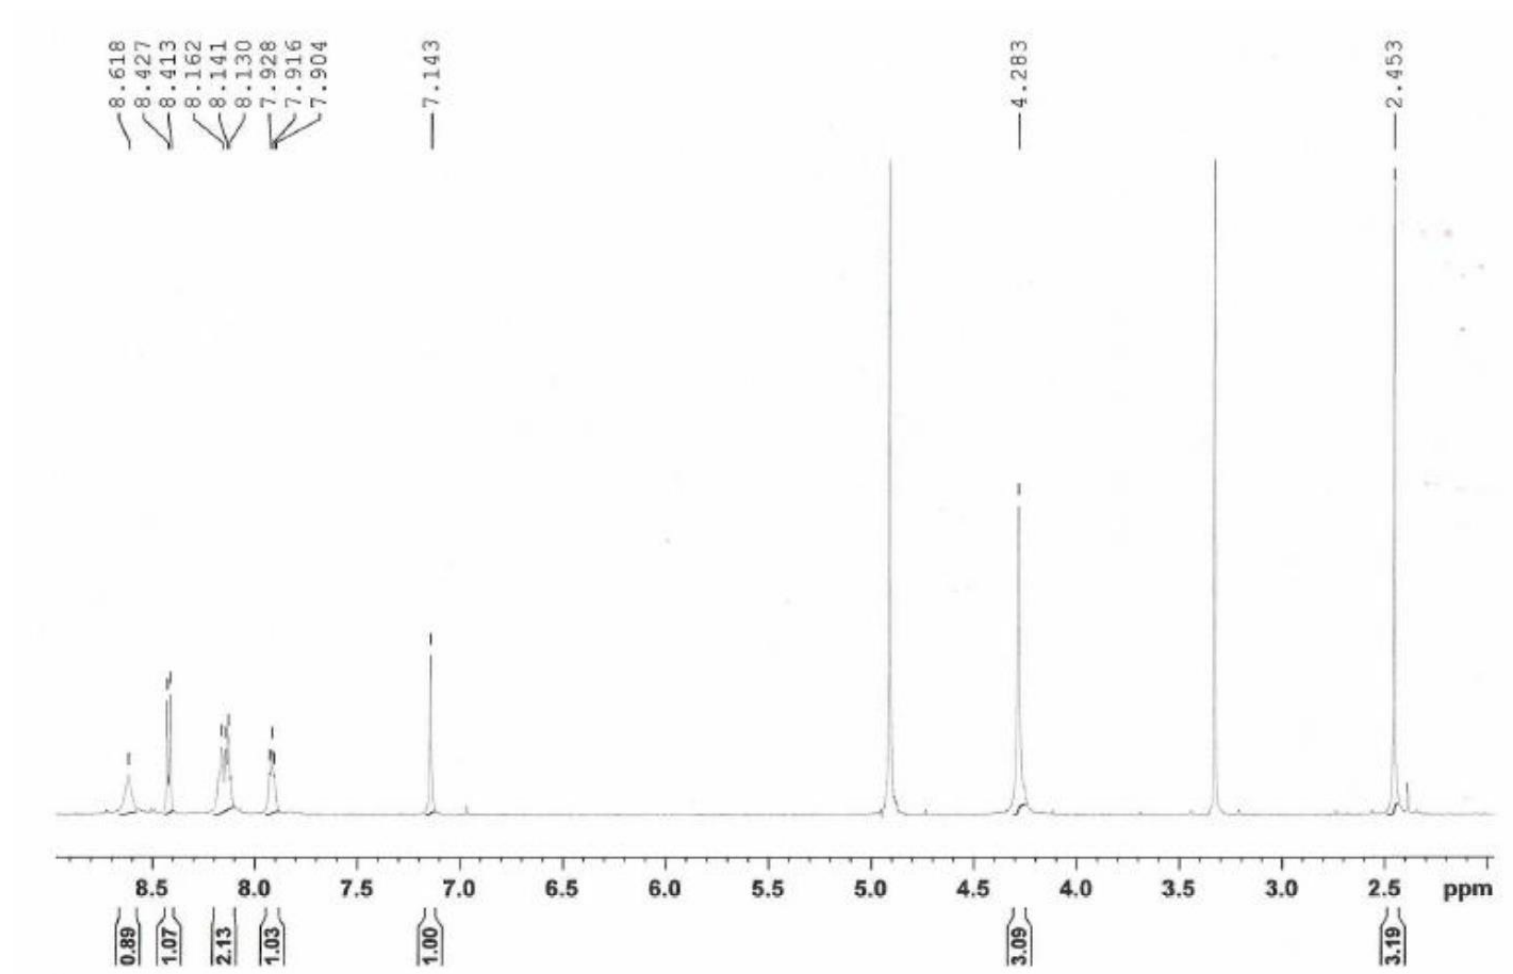

**Figure S14.**  $^{13}\text{C}$  NMR Spectrum in  $\text{CD}_3\text{OD}$  of compound **3g**.

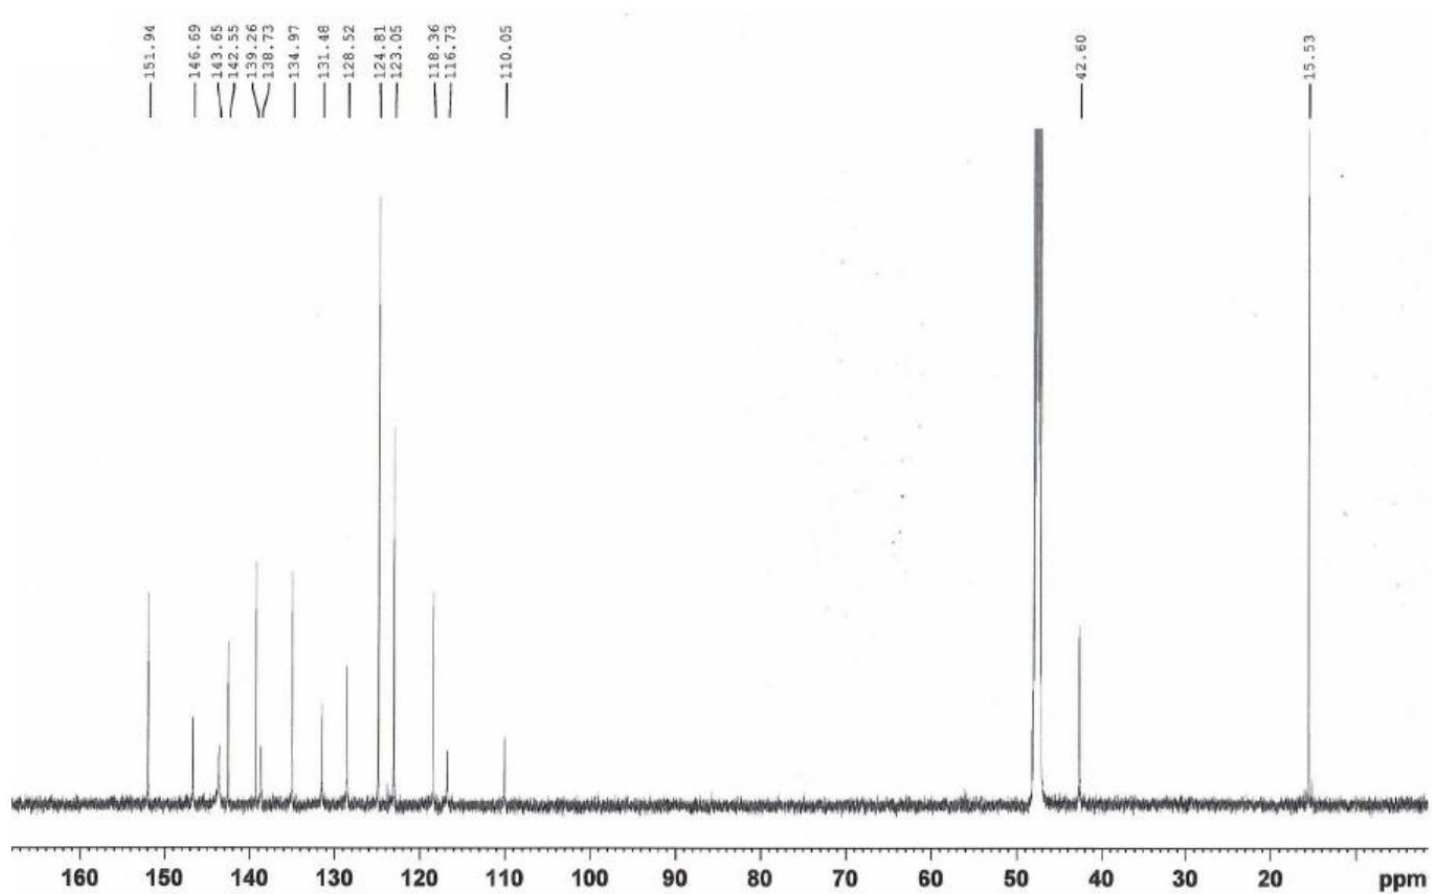

**Figure S15.**  $^1\text{H}$  NMR Spectrum in  $\text{CD}_3\text{OD}$  of compound **3h**.

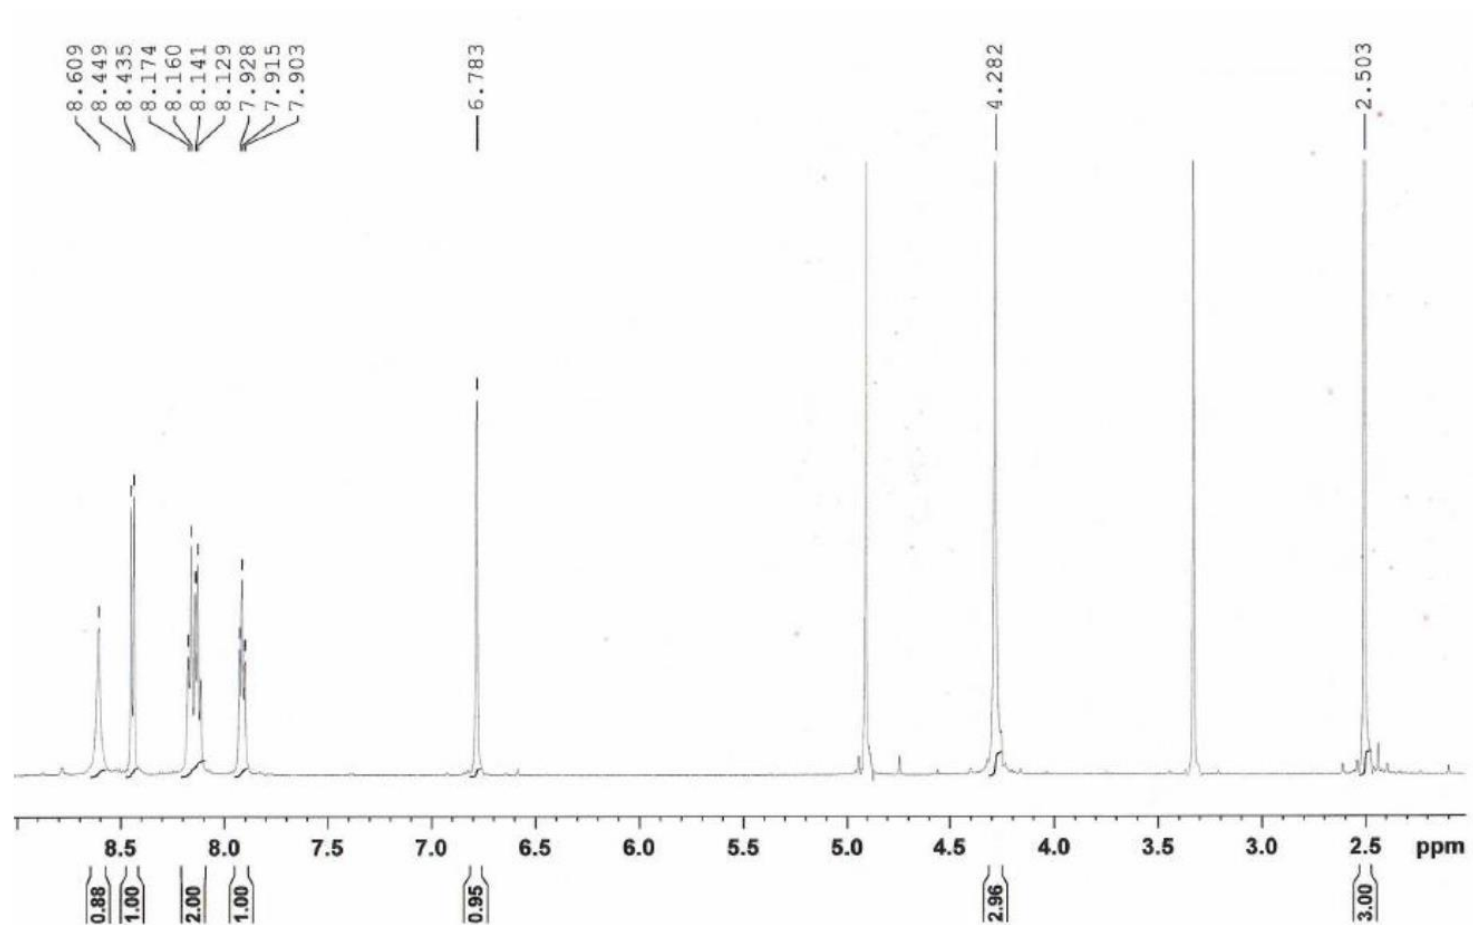

**Figure S16.**  $^{13}\text{C}$  NMR Spectrum in  $\text{CD}_3\text{OD}$  of compound **3h**.

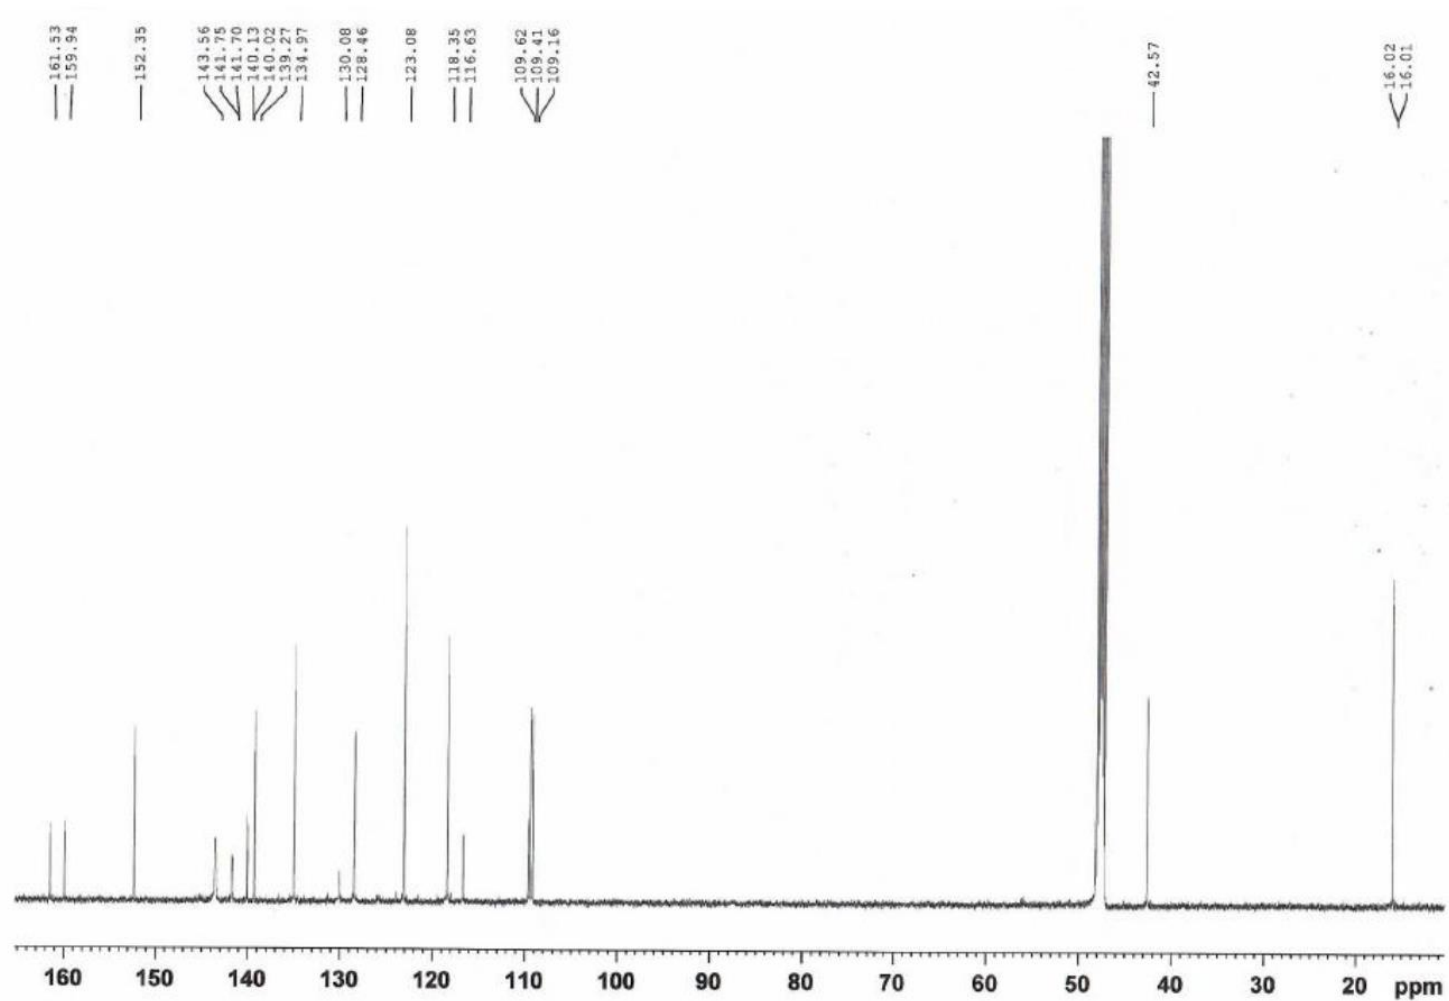

**Figure S17.**  $^1\text{H}$  NMR Spectrum in  $\text{CD}_3\text{OD}$  of compound **3i**.

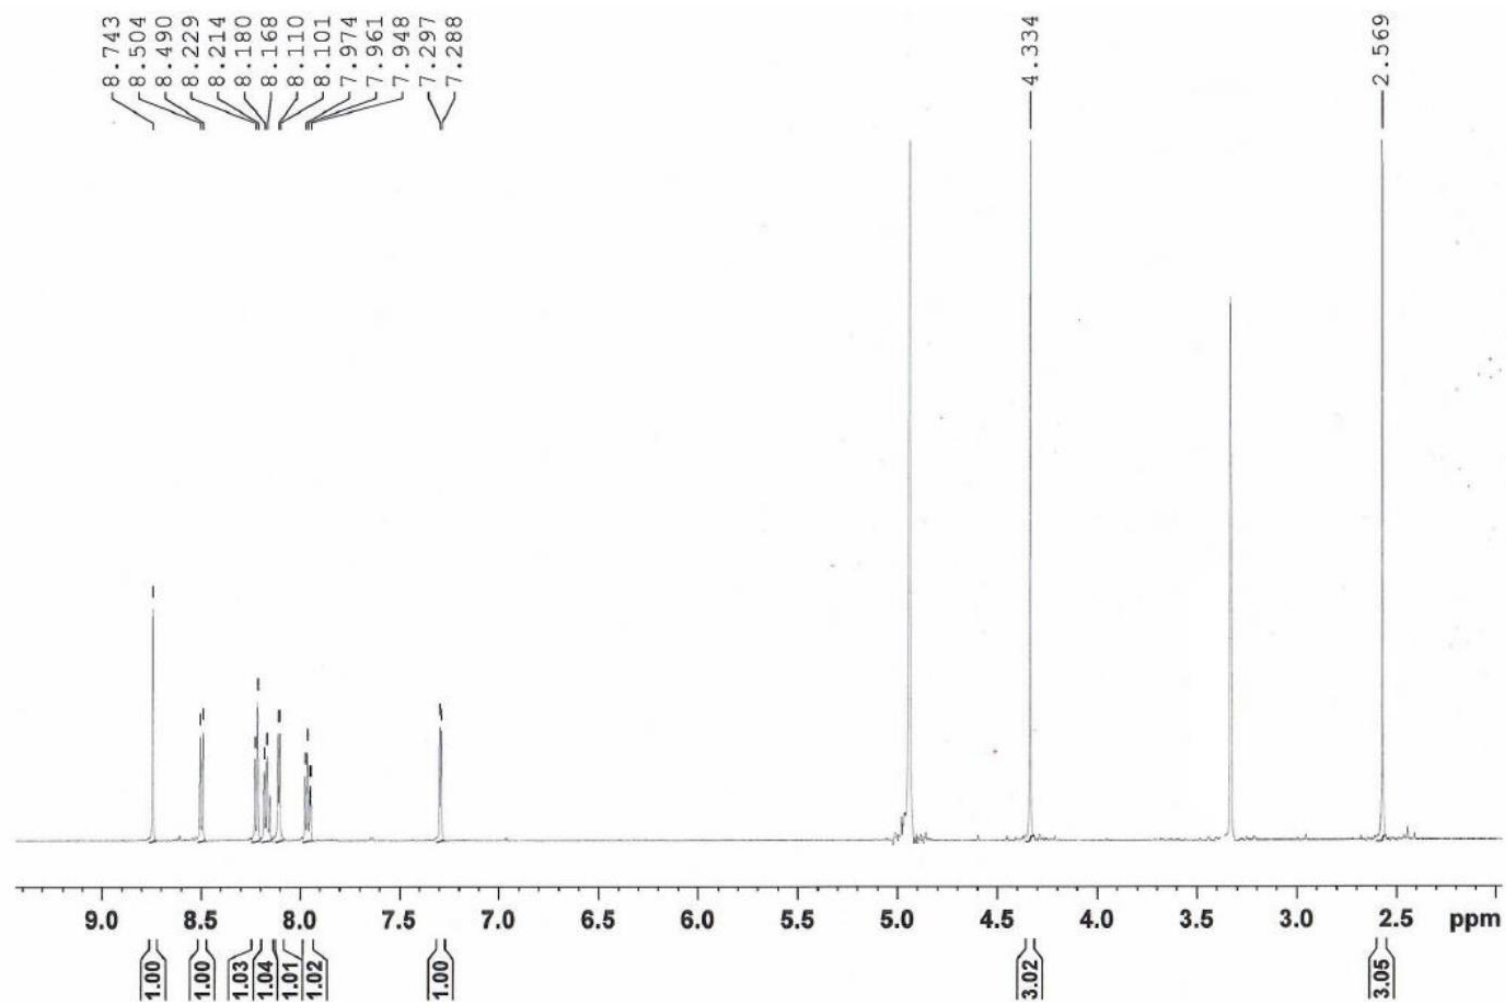

**Figure S18.**  $^{13}\text{C}$  NMR Spectrum in  $\text{CD}_3\text{OD}$  of compound **3i**.

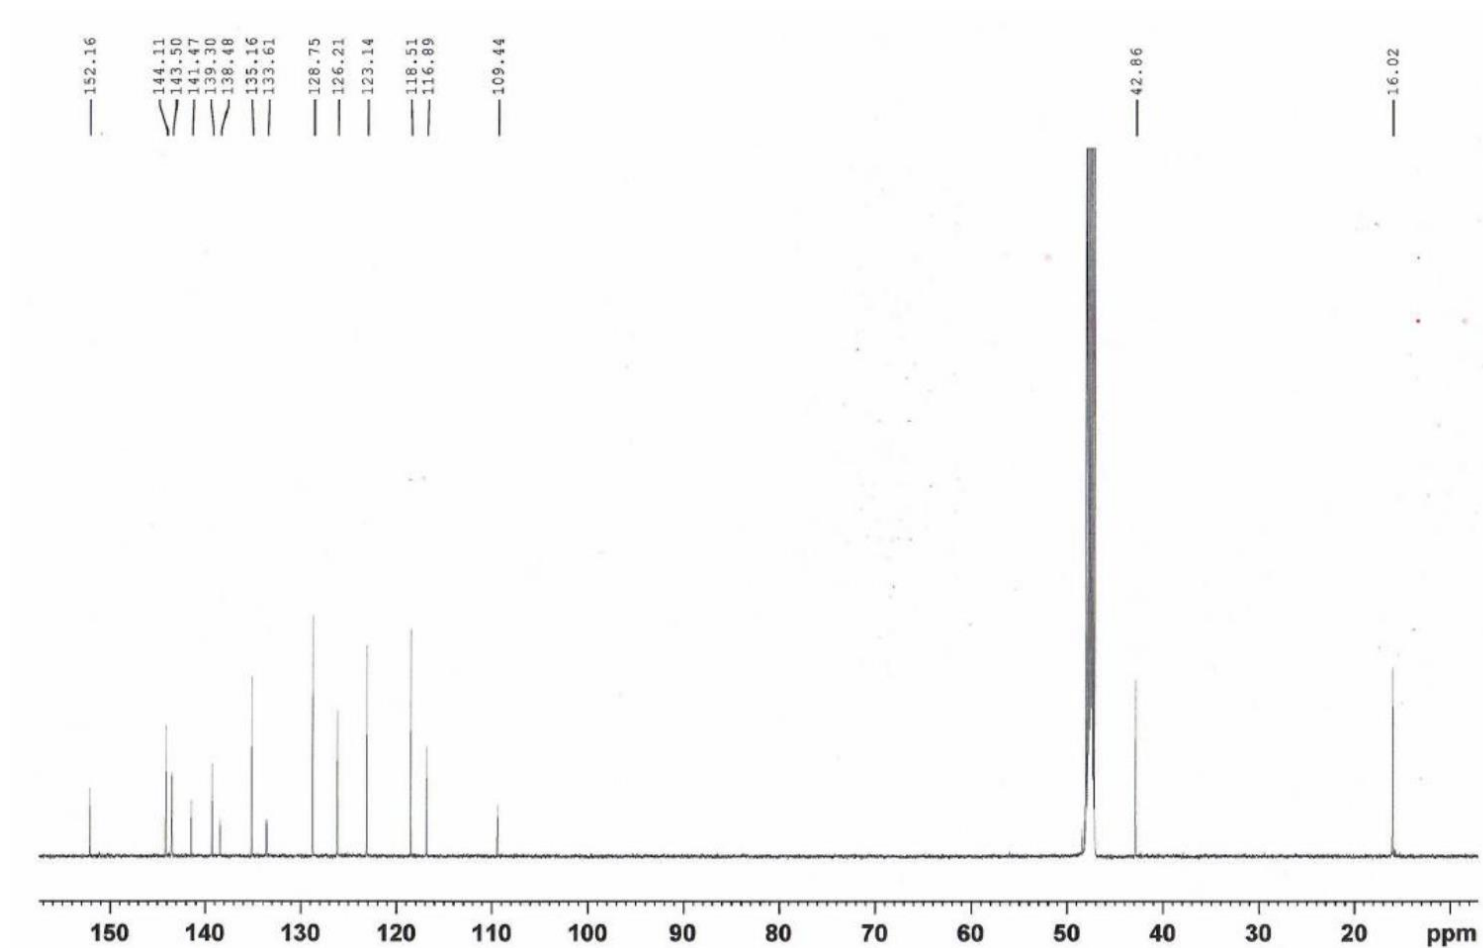

**Figure S19.**  $^1\text{H}$  NMR Spectrum in  $\text{CD}_3\text{OD}$  of compound **3j**.

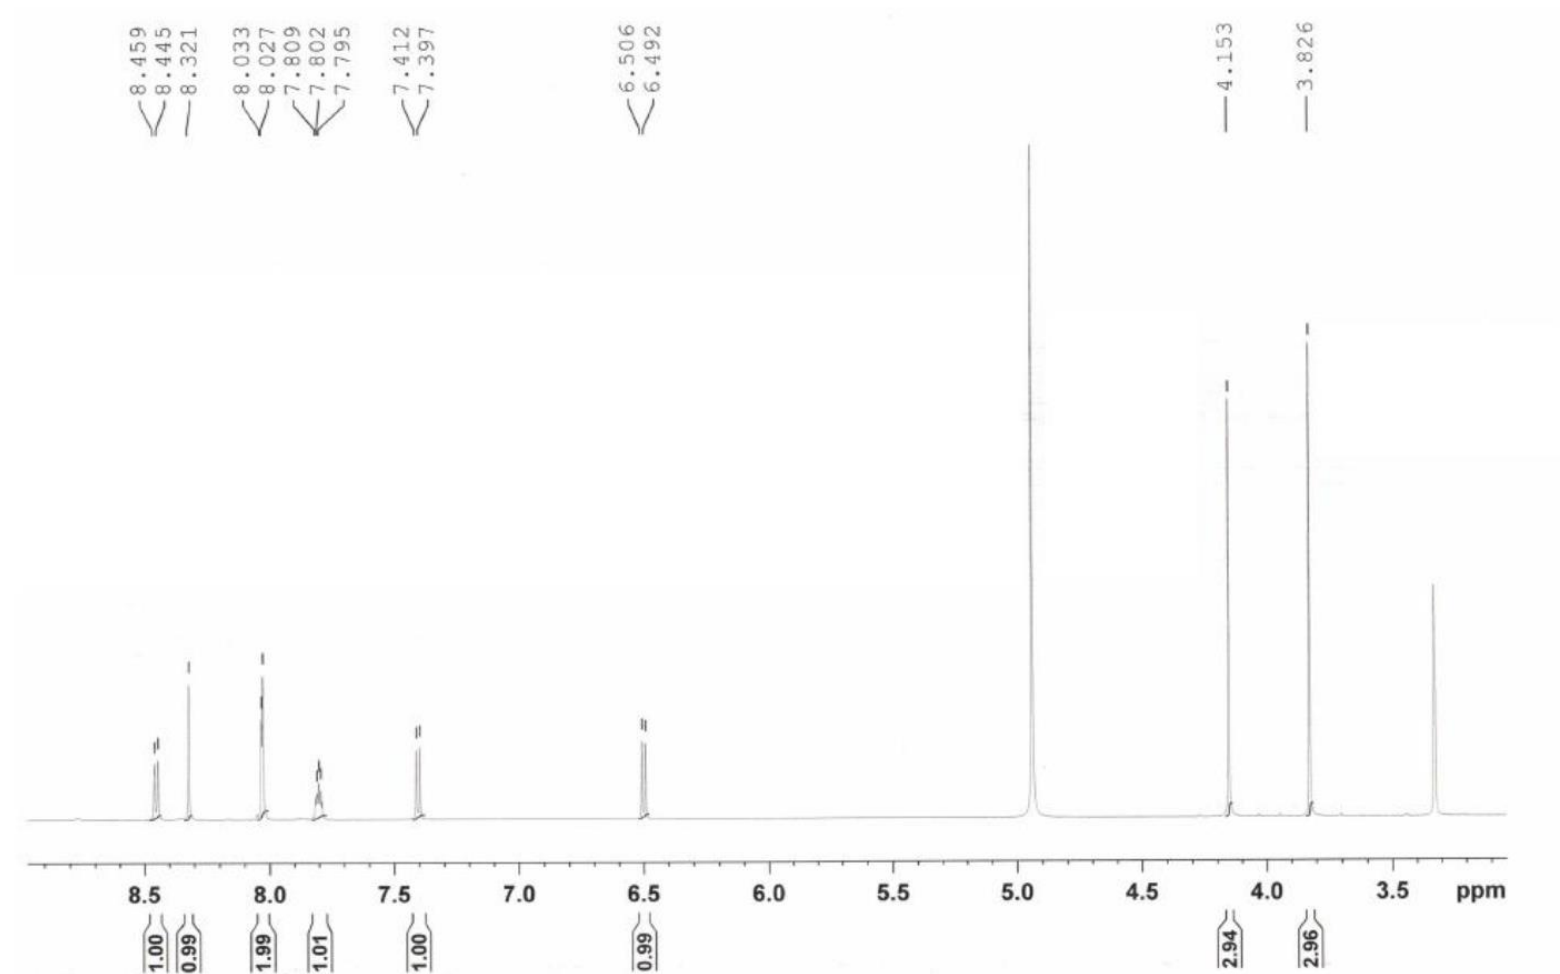

**Figure S20.**  $^{13}\text{C}$  NMR Spectrum in  $\text{CD}_3\text{OD}$  of compound **3j**.

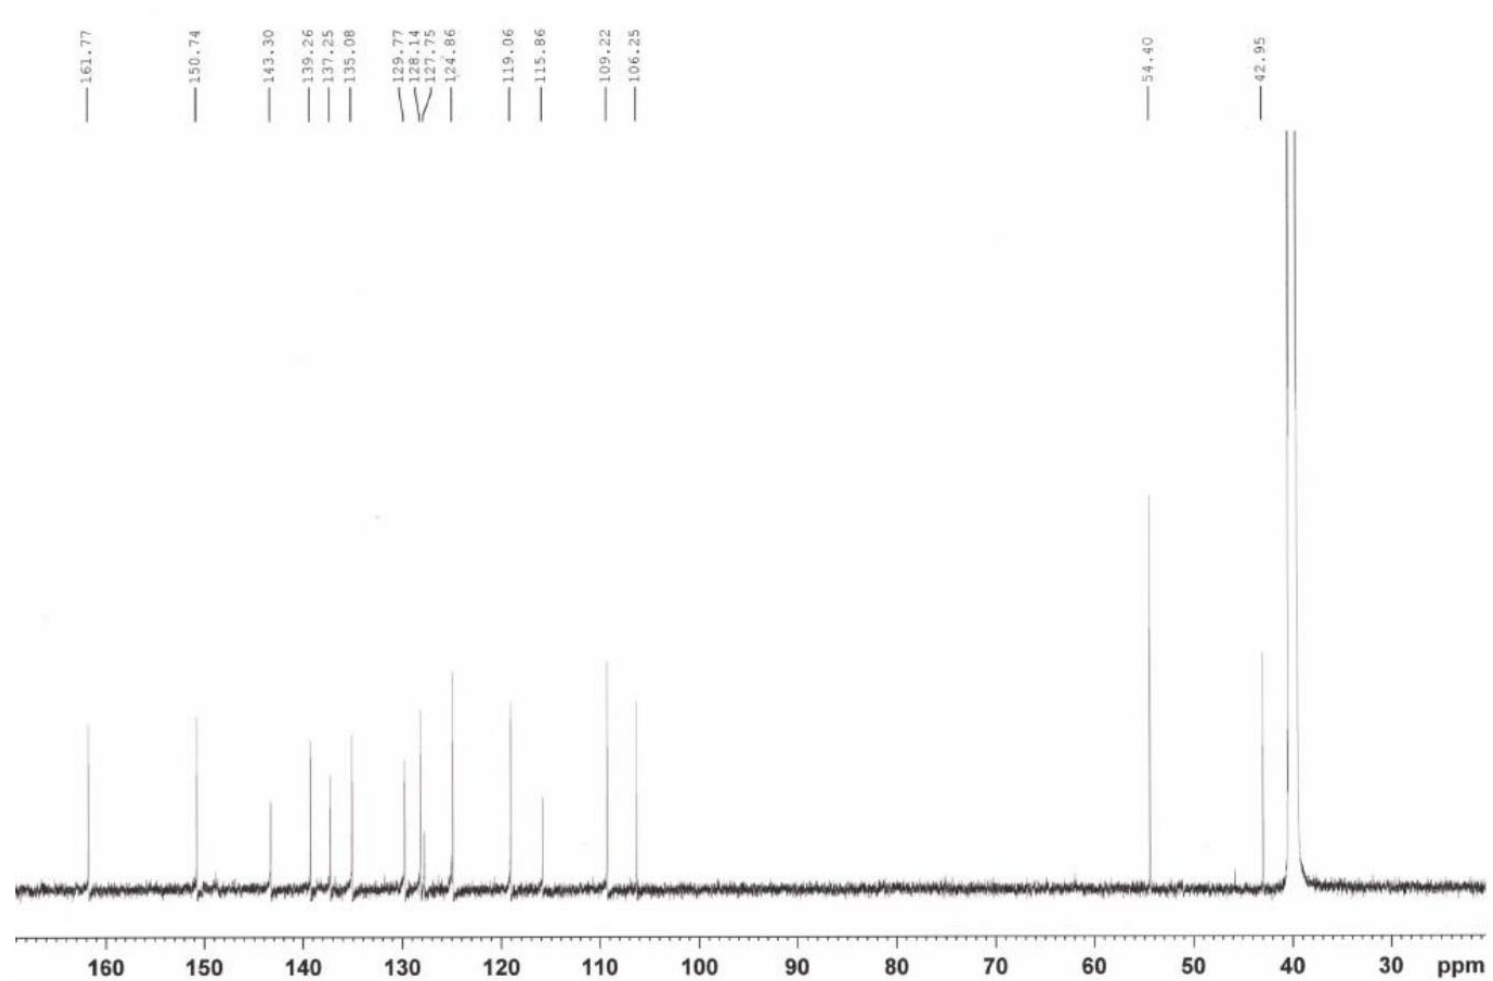

**Figure S21.**  $^1\text{H}$  NMR Spectrum in  $\text{CD}_3\text{OD}$  of compound **4a**.

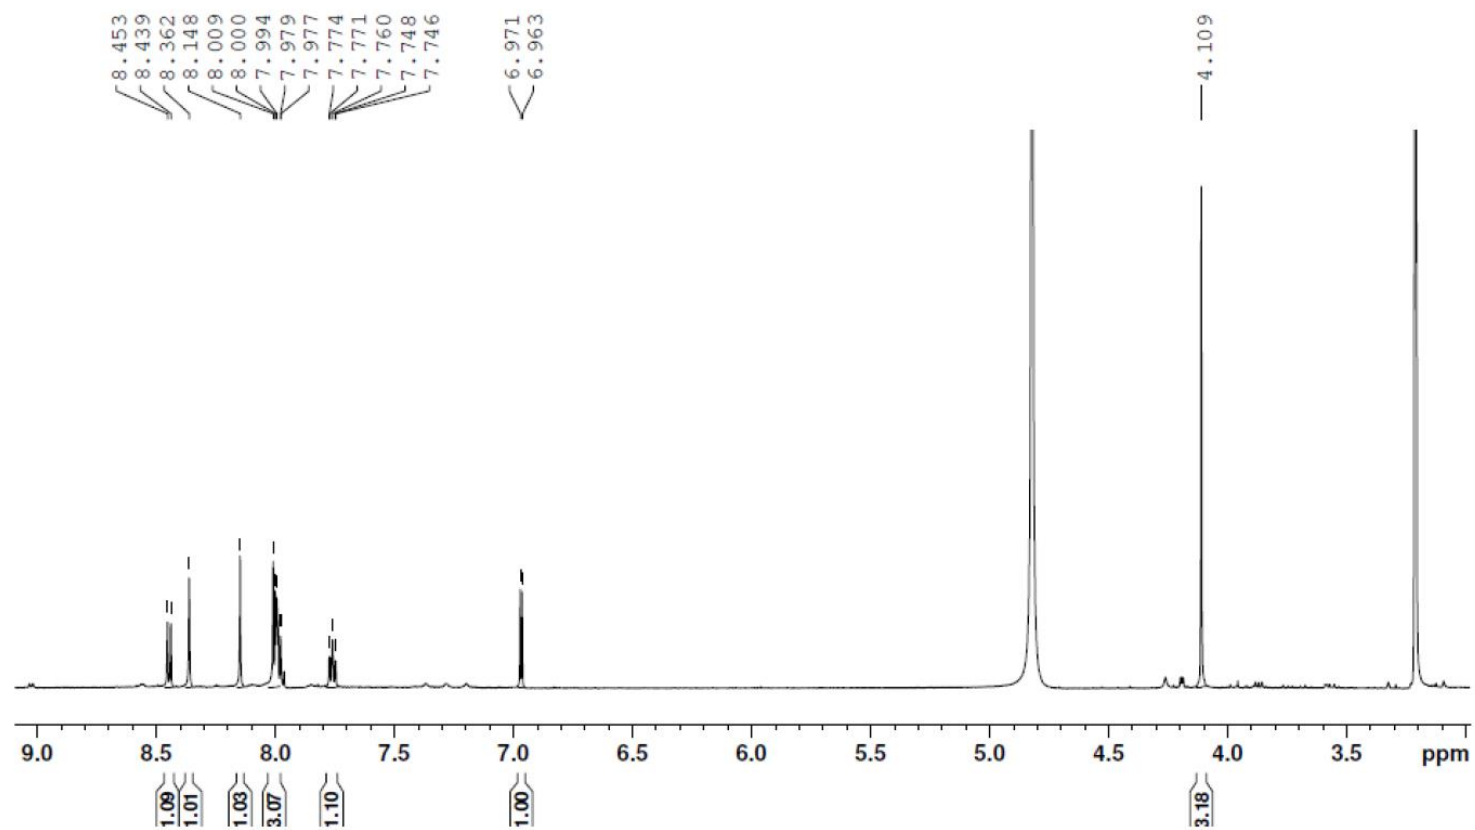

**Figure S22.**  $^{13}\text{C}$  NMR Spectrum in  $\text{CD}_3\text{OD}$  of compound **4a**.

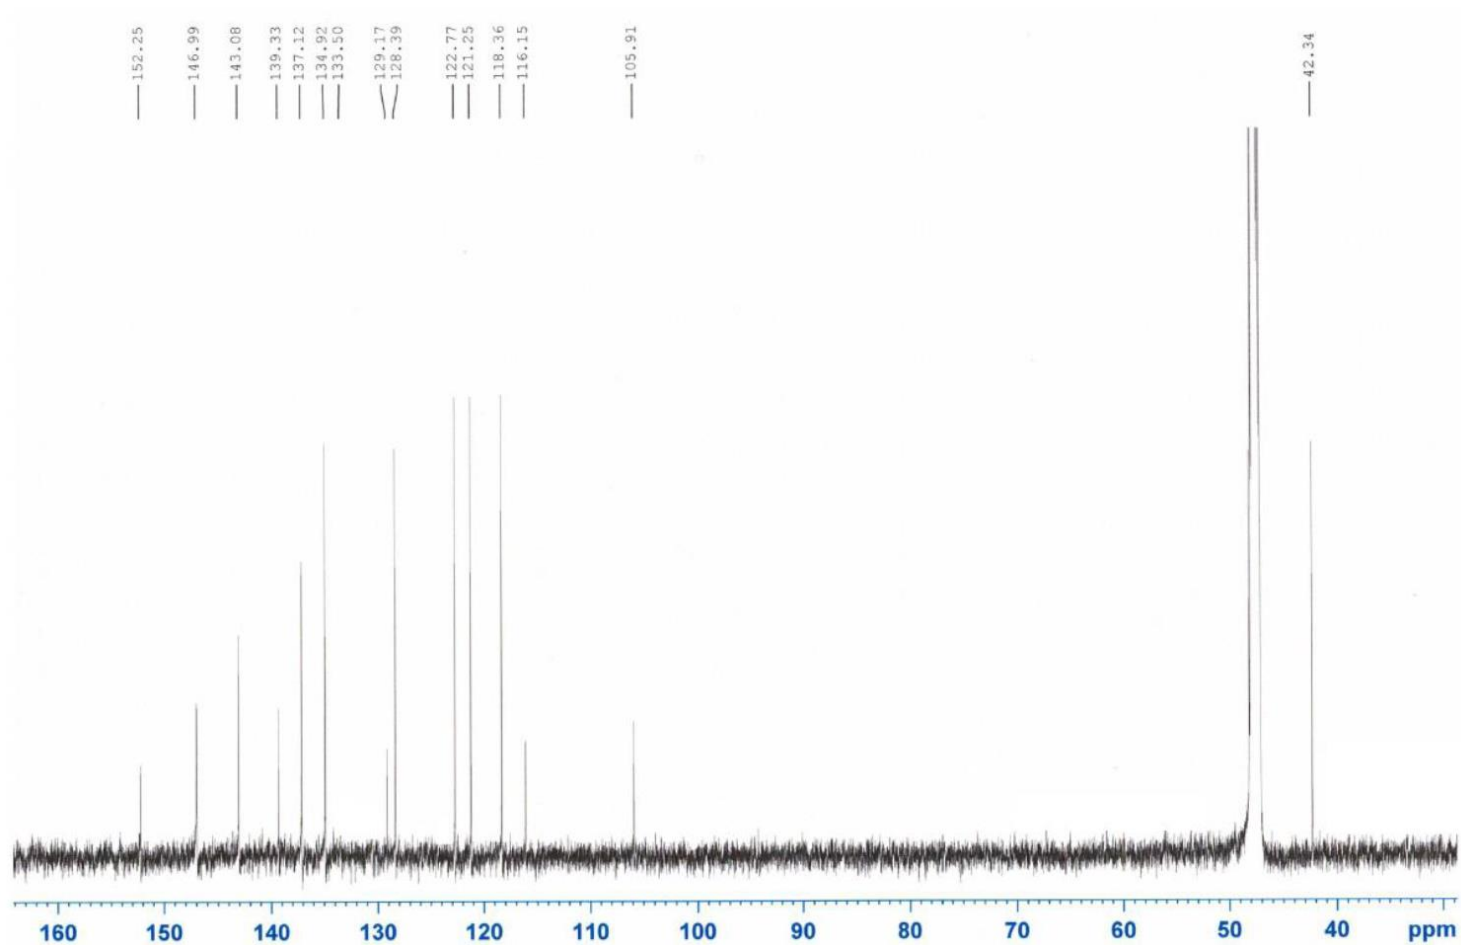

# Lonza

Lonza Walkersville, Inc.  
www.lonza.com  
scientific.support@lonza.com  
Scientific Support: 800-521-0390  
Document # CC-31-6 11/10  
Walkersville, MD 21793-0127 USA  
© 2010 Lonza Walkersville, Inc.

## Clonetics™ Dermal Fibroblast Cell Systems

### NHDF

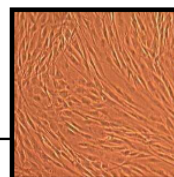

#### Introduction

Clonetics™ Dermal Fibroblast Cell Systems contain Normal Human Dermal Fibroblasts (NHDF) and optimized media for their growth. Each System can quickly generate NHDF cultures for the study of disorders of human fibroblasts such as fibrosis, scleroderma, fibrosarcoma, xeroderma pigmentosum and histiocytoma. Clonetics™ Dermal Fibroblast Cell Systems are convenient and easy to use, allowing the researcher to focus on results. Cryopreserved NHDF are shipped as frozen primaries. Proliferating NHDF are shipped as secondary cultures.

Clonetics™ Cells, Medium and Reagents are quality tested together and guaranteed to give optimum performance as a complete Cell System.

#### Cell System Components (Need to be purchased separately)

- One Dermal Fibroblast Cell Product (Cryopreserved or Proliferating)
- One Fibroblast Cell Medium BulletKit™ - 500 ml  
Clonetics™ FGM™-2 BulletKit™ (CC-3132) contains one 500 ml bottle of Fibroblast Cell Basal Medium and the following growth supplements: hFGF-B, 0.5 ml; Insulin, 0.5 ml; FBS, 10 ml; GA-1000, 0.5 ml.
- One ReagentPack™ (CC-5034) Containing:

|                                |        |
|--------------------------------|--------|
| Trypsin/EDTA                   | 100 ml |
| Trypsin Neutralizing Solution  | 100 ml |
| HEPES Buffered Saline Solution | 100 ml |

#### Characterization of Cells

Routine characterization of NHDF includes morphological observation throughout serial passages.

#### Performance

|                                                                    |                             |
|--------------------------------------------------------------------|-----------------------------|
| Recommended seeding density for subculture                         | 3,500 cells/cm <sup>2</sup> |
| Typical time from subculture to confluent monolayer                | 6 - 9 days                  |
| Additional population doublings guaranteed using Clonetics™ System | 15                          |

#### Quality Control

All cells are performance assayed and test negative for HIV-1, mycoplasma, Hepatitis-B, Hepatitis-C, bacteria, yeast and fungi. Cell viability, morphology and proliferative capacity are measured after recovery from cryopreservation. Clonetics™ Media are formulated for optimal growth of specific types of normal human cells. Certificates of Analysis (COA) for each cell strain are shipped with each order. COA for all other products are available upon request.

# Lonza

## Ordering Information

### Cryopreserved Cells

|         |          |                |
|---------|----------|----------------|
| CC-2511 | NHDF-Ad  | ≥500,000 cells |
| CC-2509 | NHDF-Neo | ≥500,000 cells |

### Proliferating Cells – Flasks and Multiwell Plates

#### NHDF-Ad

|         |               |
|---------|---------------|
| CC-2611 | T-25 Flask    |
| CC-0252 | T-75 Flask    |
| CC-0160 | 96-well Plate |

#### NHDF-Neo

|         |               |
|---------|---------------|
| CC-2609 | T-25 Flask    |
| CC-0210 | T-75 Flask    |
| CC-0116 | 96-well Plate |

Other proliferating formats are available. Contact Scientific Support or refer to the Lonza website for details.

|         |                                                                 |        |
|---------|-----------------------------------------------------------------|--------|
| CC-3132 | FGM™-2 BulletKit™, FBM™ plus SingleQuots™ of Growth Supplements | 500 ml |
| CC-3131 | FBM™, Fibroblast Basal Medium                                   | 500 ml |
| CC-4126 | FGM™-2 SingleQuots™, Formulates FBM™ to FGM™-2                  |        |
| CC-5034 | ReagentPack™                                                    |        |
|         | Trypsin/EDTA Solution                                           | 100 ml |
|         | Trypsin Neutralizing Solution                                   | 100 ml |
|         | HEPES Buffered Saline Solution                                  | 100 ml |

When placing an order or for technical service, please refer to the product numbers and descriptions listed above. For a complete listing of all Clonetics™ Products, refer to the Lonza website or the current Lonza catalog. To obtain a catalog, additional information or technical service you may contact Lonza by web, e-mail, telephone, fax or mail.

## Product Warranty

CULTURES HAVE A FINITE LIFESPAN IN VITRO. Lonza guarantees the performance of its cells only if Clonetics™ Media and Reagents are used exclusively, and the recommend protocols are followed. The performance of cells is not guaranteed

THESE PRODUCTS ARE FOR RESEARCH USE ONLY. Not approved for human or veterinary use, for application to humans or animals, or for use in clinical or in vitro procedures.

**WARNING: CLONETICS™ AND POIETICS™ PRODUCTS CONTAIN HUMAN SOURCE MATERIAL, TREAT AS POTENTIALLY INFECTIOUS.** Each donor is tested and found non-reactive by an FDA approved method for the presence of HIV-1, Hepatitis B Virus and Hepatitis C Virus. Where donor testing is not possible, cell products are tested for the presence of viral nucleic acid from HIV, Hepatitis B Virus, and Hepatitis C Virus. Testing can not offer complete assurance that HIV-1, Hepatitis B Virus, and Hepatitis C Virus are absent. All human sourced products should be handled at the Biological Safety Level 2 to minimize exposure of potentially infectious products, as recommended in the CDC-NIH Manual, [Biosafety in Microbiological and Biomedical Laboratories](#), 5<sup>th</sup> Edition. If you require further information, please contact your site Safety Officer or Scientific Support.
